# Supplementary material for: A model of head direction and landmark coding in complex environments
Source: PubMed Central journal article supplement (PMC8496825; doi:10.1371/journal.pcbi.1009434), 2021-09-27

# aLB representations in different algorithms

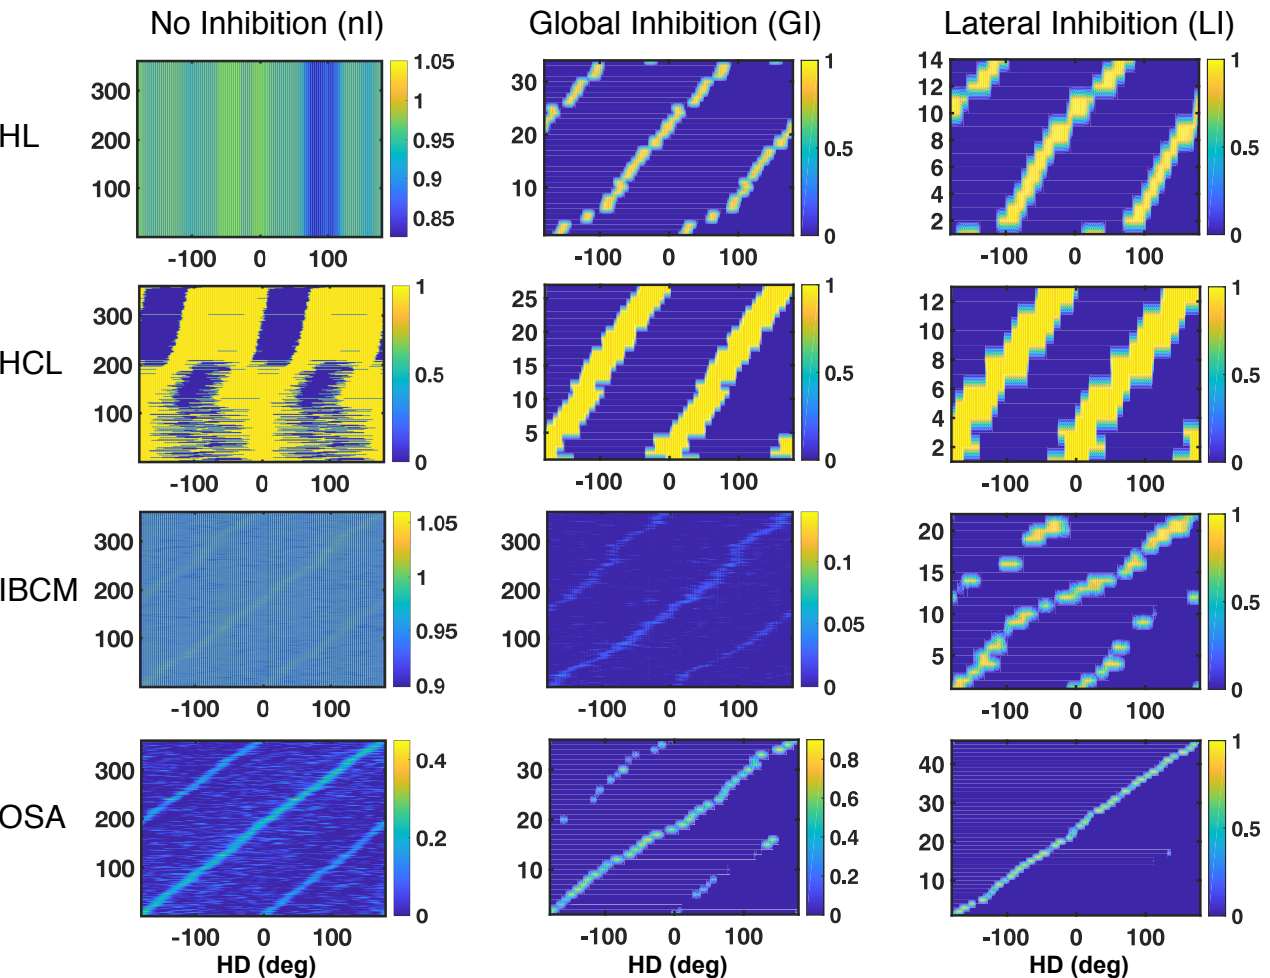

Supplement: pcbi.1009434.s006.pdf [file pcbi.1009434.s006.pdf]
